# Supplementary material
Source: PubMed Central journal article supplement (PMC4197128)

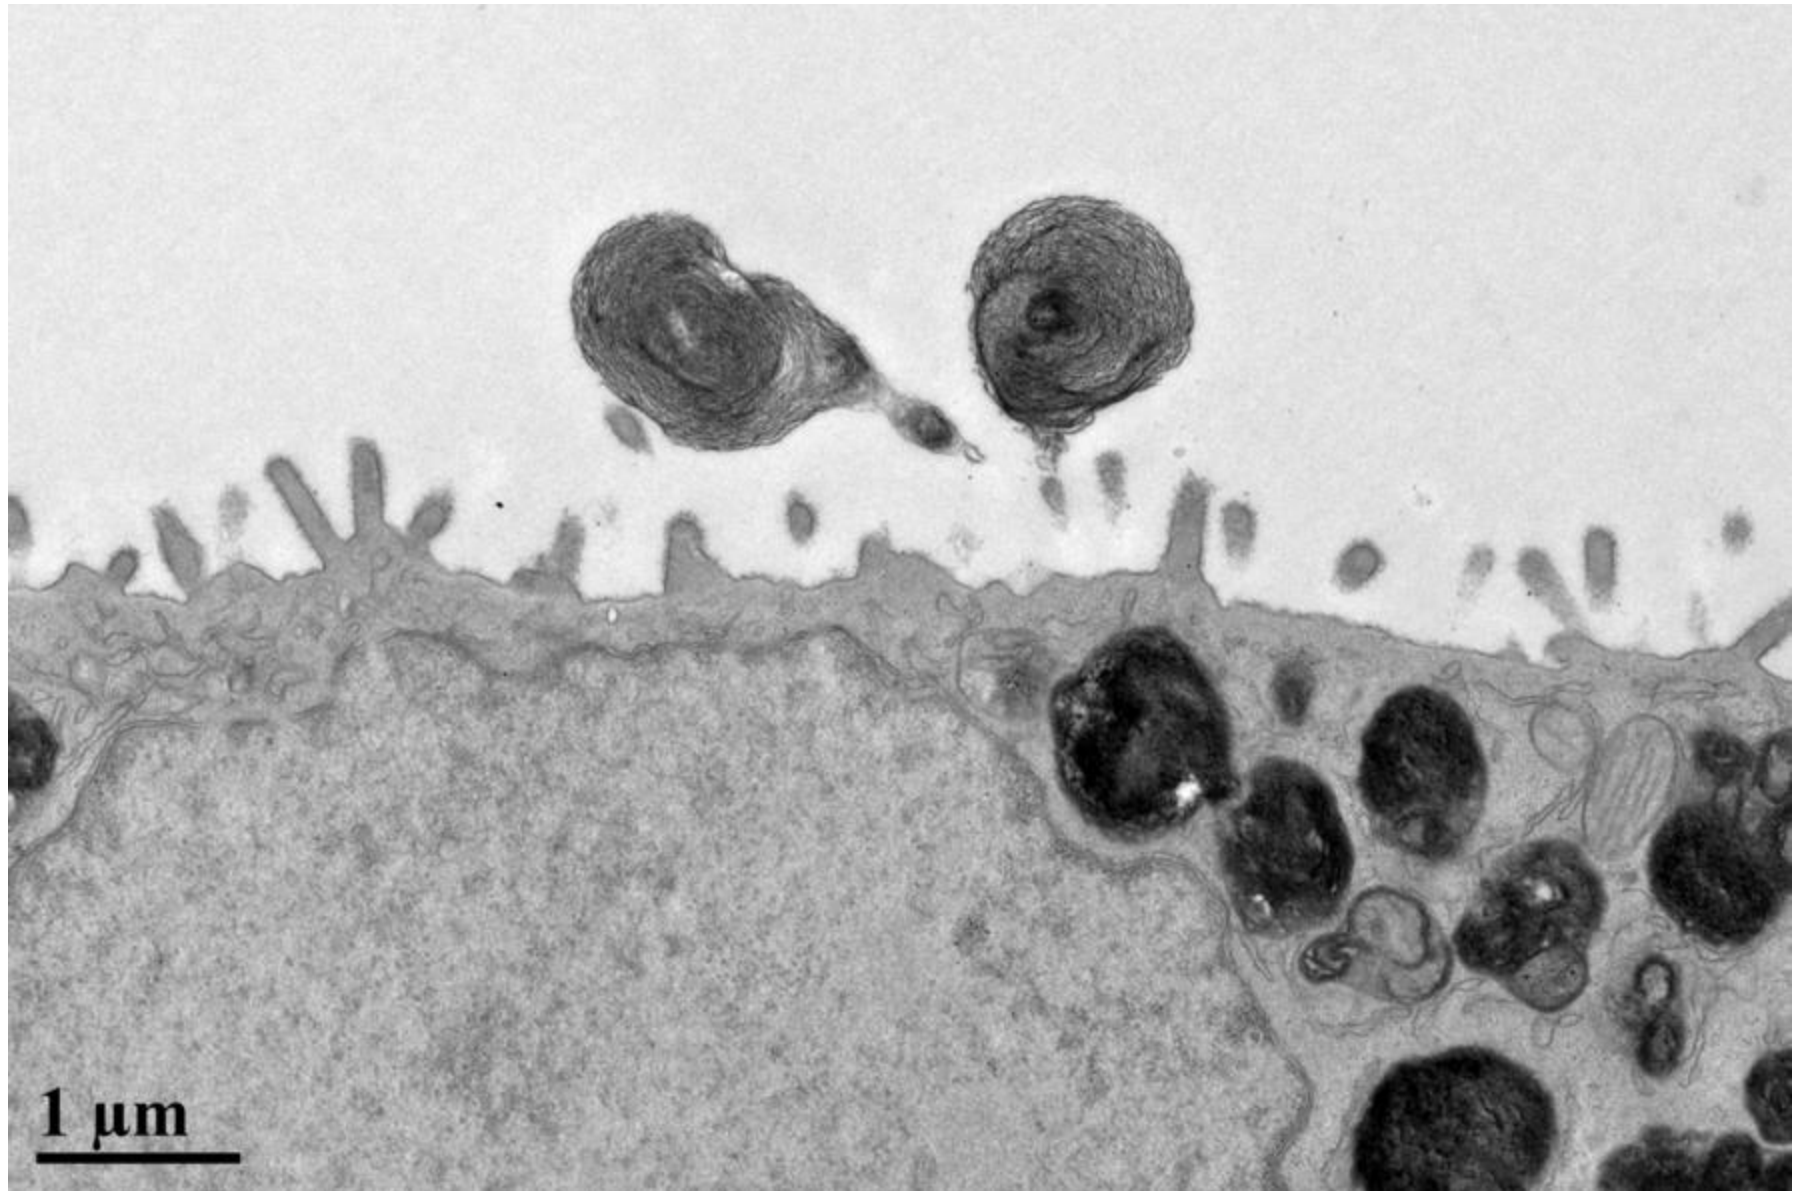

Supplement: NIHMS632107-supplement-Suppl_Figure_1.pdf [file NIHMS632107-supplement-Suppl_Figure_1.pdf]

## Air liquid interface (A/L)

## Plastic (P)

### ABCA3

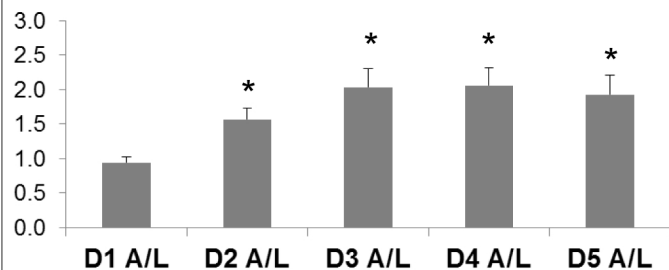

### ABCA3

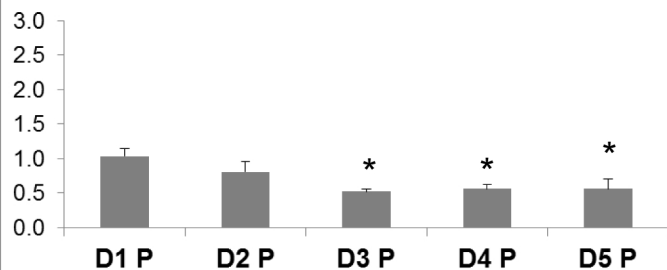

### PDPN

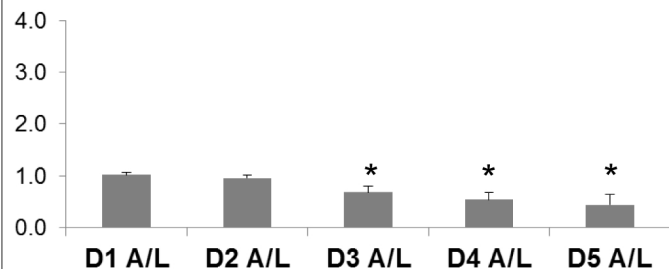

### PDPN

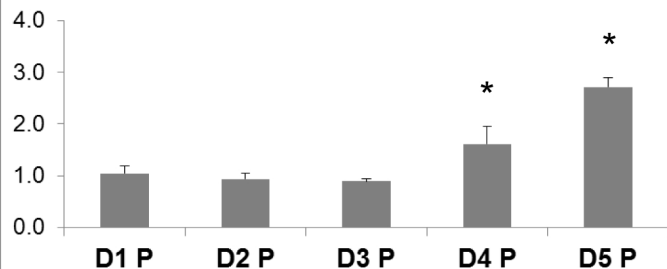

### CAV1

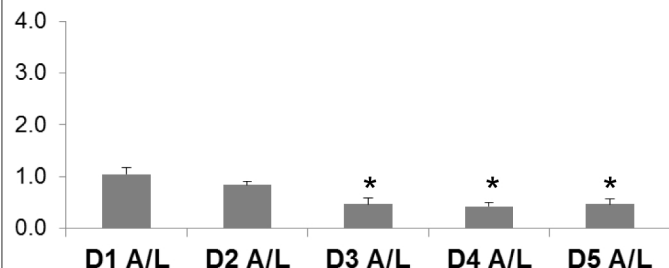

### CAV1

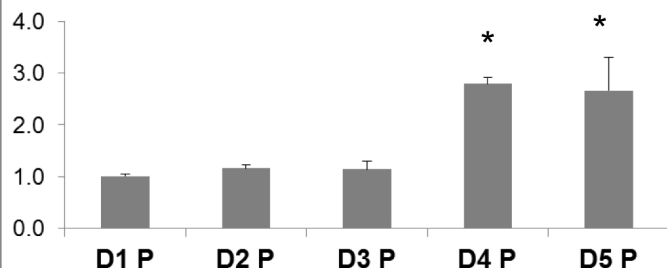

### RAGE

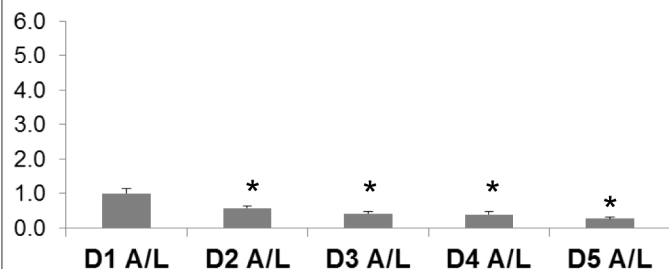

### RAGE

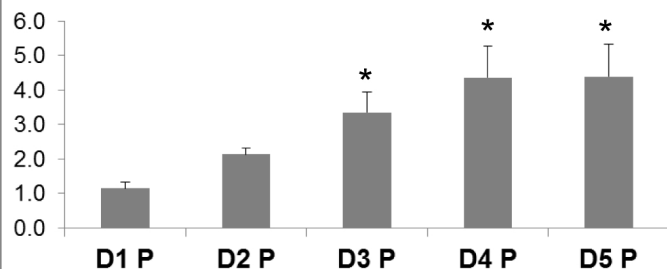

Supplement: NIHMS632107-supplement-Suppl_Figure_3.pdf [file NIHMS632107-supplement-Suppl_Figure_3.pdf]
